# Supplementary material for: Identification of CD8+ T Cell-Related Genes: Correlations with Immune Phenotypes and Outcomes of Liver Cancer
Source: PubMed Central journal article supplement (PMC8192185; doi:10.1155/2021/9960905), 2021-06-02

A

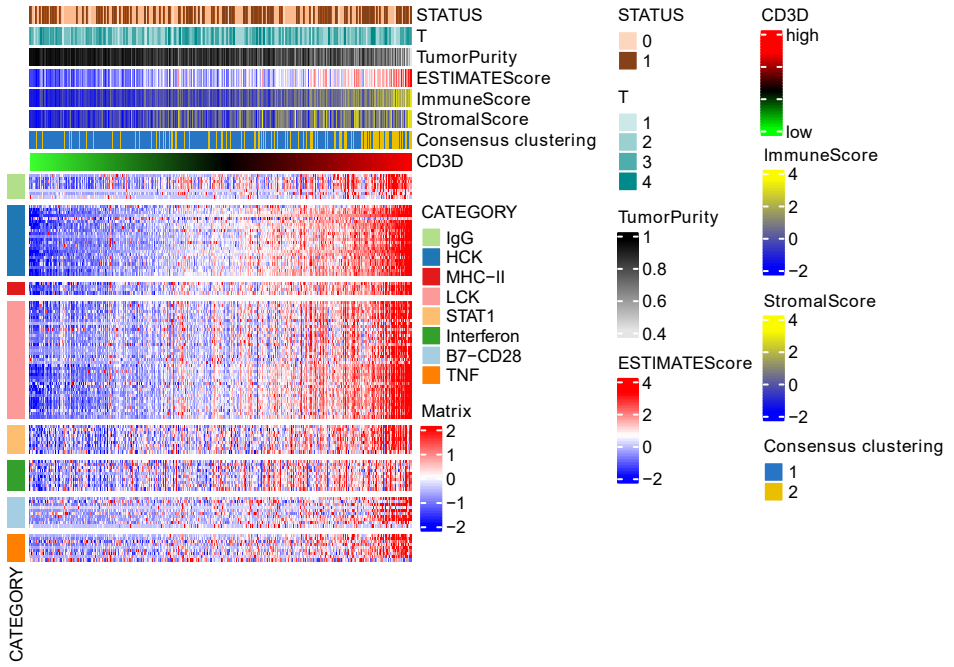

B

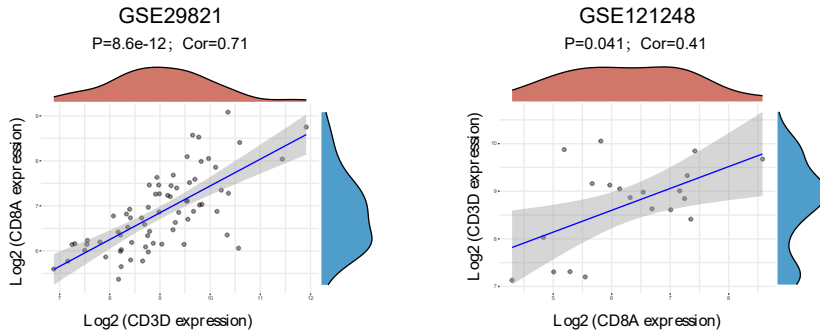

C

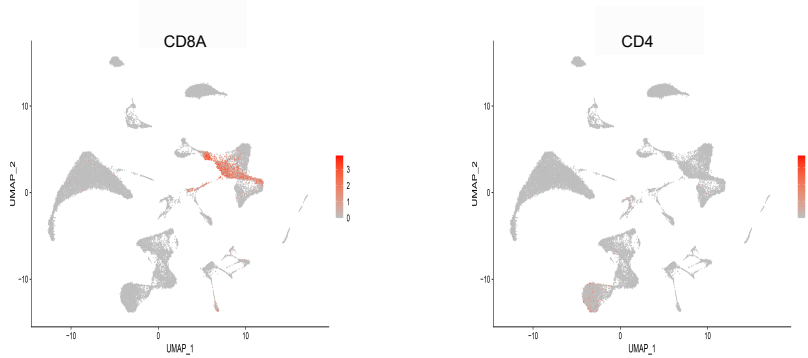

Supplement: 9960905.f1.pdf [file 9960905.f1.pdf]
